# Supplementary material
Source: publisher figshare collection journal article supplement (https://acs.figshare.com/ndownloader/files/4768963)
Supplement: Supplementary file 1 [file 4768963]

**Replacement of the N-terminal Tyrosine Residue in Opioid Peptides with 3-(2,6-Dimethyl-4-carbamoylphenyl)propanoic Acid (Dcp) Results in Novel Opioid Antagonists**

Yixin Lu,<sup>\*,†</sup> Tze Keong Lum,<sup>†</sup> Yoon Wui Leow Augustine,<sup>†</sup> Grazyna Weltrowska<sup>‡</sup>,  
Thi M.-D. Nguyen,<sup>‡</sup> Carole Lemieux,<sup>‡</sup> Nga N. Chung,<sup>‡</sup> and Peter W. Schiller<sup>\*,‡</sup>

<sup>†</sup>*Department of Chemistry, National University of Singapore, 3 Science Drive 3, Singapore 117543, Singapore, and* <sup>‡</sup>*Laboratory of Chemical Biology and Peptide Research, Clinical Research Institute of Montreal, 110 Pine Avenue West, Montreal, Quebec, Canada H2W 1R7*

**Experimental Section**

**General Methods.** Molecular masses of the compounds were determined by electrospray mass spectrometry on a Hybrid Q-ToF mass spectrometer interfaced to a MassLynx 4.0 data system or on a Finnigan/MAT 95XL-T spectrometer. <sup>1</sup>H and <sup>13</sup>C NMR spectra were recorded on a Varian Unity 400 spectrometer or a Bruker Model *Avance* 300 MHz or DPX-300 NMR spectrometer, and referenced with respect to the residual signals of the solvent. The following abbreviations were used in reporting spectra: s = singlet, d = doublet, t = triplet, q = quartet, m = multiplet, dd = doublet of doublets. Compounds **5**, **8**, **9** and **10** were purified by flash chromatography on silica gel (40 µm; Baker). Peptides were purified on a Vydac 218-TP1022 column (22 x 250 mm) with a linear gradient of 20-80% MeOH in 0.1% TFA over 30 min at a flow rate of 12 mL/min (peptides **1** and **2**) or with a linear gradient of 20-65% MeOH in 0.1% TFA over 50 min at a flow rate of 12 mL/min (peptide **3**). Analytical reversed-phase HPLC was performed on a Vydac 218-TP54 column (5 x 250 mm) under isocratic conditions (35% MeOH in 0.1% TFA) at a flow rate of 1 mL/min. The same column was also used for the determination of the capacity factors K' under the same conditions. Precoated plates (silica gel 60 F<sub>254</sub>, 250 µm; Merck, Darmstadt, Germany) were used for ascending TLC in the following solvent systems (all v/v): (I) *n*-BuOH/AcOH/H<sub>2</sub>O (4:1:1), (II) *n*-BuOH/pyridine/AcOH/H<sub>2</sub>O (15:10:3:12).

**In Vitro Bioassays and Receptor Binding Assays.** The GPI<sup>16</sup> and MVD<sup>17</sup> bioassays were carried out as reported in detail elsewhere.<sup>18,19</sup> K<sub>e</sub> values for antagonists were determined from the ratio of IC<sub>50</sub> values obtained with an agonist in the presence and absence of a fixed antagonist concentration.<sup>20</sup> µ antagonist K<sub>e</sub> values of compounds were determined in the GPI assay against the µ agonist TAPP<sup>21</sup> using antagonist concentrations ranging from 10 to 500 nM. κ antagonist K<sub>e</sub> values of compounds were

also measured in the GPI assay against the  $\kappa$  agonist U50,488, using antagonist concentrations ranging from 50 to 200 nM.  $\delta$  antagonist  $K_e$  values of compounds were determined in the MVD assay against the  $\delta$  agonist DPDPE using antagonist concentrations ranging from 200 to 600 nM.

Opioid receptor binding studies were performed as described in detail elsewhere.<sup>18</sup> Binding affinities for  $\mu$  and  $\delta$  receptors were determined by displacing, respectively, [<sup>3</sup>H]DAMGO (Multiple Peptide Systems, San Diego, CA) and [<sup>3</sup>H]DSLET (Multiple Peptide Systems) from rat brain membrane binding sites, and  $\kappa$  opioid receptor affinities were measured by displacement of [<sup>3</sup>H]U69,593 (Amersham) from guinea pig brain membrane binding sites. Incubations were performed for 2 h at 0 °C with [<sup>3</sup>H]DAMGO, [<sup>3</sup>H]DSLET, and [<sup>3</sup>H]U69,593 at respective concentrations of 0.72, 0.78, and 0.80 nM. IC<sub>50</sub> values were determined from log-dose displacement curves, and K<sub>i</sub> values were calculated from the obtained IC<sub>50</sub> values by means of the equation of Cheng and Prusoff,<sup>22</sup> using values of 1.3, 2.6, and 2.9 nM for the dissociation constants of [<sup>3</sup>H]DAMGO, [<sup>3</sup>H]DSLET, and [<sup>3</sup>H]U69,593, respectively.

## References

- (16) Paton, W.D.M. The Action of Morphine and Related Substances on Contraction and on Acetylcholine Output of Coaxially Stimulated Guinea Pig Ileum. *Br. J. Pharmacol.* **1957**, *12*, 119-127.
- (17) Henderson, G.; Hughes, J.; Kosterlitz, H.W. A New Example of a Morphine Sensitive Neuroeffector Junction. *Br. J. Pharmacol.* **1972**, *46*, 764-766.
- (18) Schiller, P.W.; Lipton, A.; Horrobin, D.F.; Bodanszky, M. Unsulfated C-terminal 7-Peptide of Cholecystikinin: a New Ligand of the Opiate Receptor. *Biochem. Biophys. Res. Commun.* **1978**, *85*, 1332-1338.
- (19) DiMaio, J.; Nguyen, T.M.-D.; Lemieux, C.; Schiller, P.W. Synthesis and Pharmacological Characterization In Vitro of Cyclic Enkephalin Analogues: Effects of Conformational Constraints on Opiate Receptor Selectivity. *J. Med. Chem.* **1982**, *25*, 1432-1438.
- (20) Kosterlitz, H.W.; Watt, A.J. Kinetic Parameters of Narcotic Agonists and Antagonists with Particular Reference to N-Allylnoroxymorphone (Naloxone). *Br. J. Pharmacol.* **1968**, *33*, 266-276.
- (21) Schiller, P.W.; Nguyen, T.M.-D.; Chung, N.N.; Lemieux, C. Dermorphin Analogues Carrying an Increased Positive Net Charge in Their "Message Domain" Display Extremely High  $\mu$  Opioid Receptor Selectivity. *J. Med. Chem.* **1989**, *32*, 698-703.
- (22) Cheng, Y.C.; Prusoff, W.H. Relationship Between the Inhibition Constant (K<sub>i</sub>) and the Concentration of Inhibitor which Causes 50 Percent Inhibition (I<sub>50</sub>) of an Enzymatic Reaction. *Biochem. Pharmacol.* **1973**, *22*, 3099-3102.
